# Supplementary material for: All solution-processed red organic light-emitting diode based on a new thermally cross-linked heteroleptic Ir(iii) complex
Source: Royal Society of Chemistry journal article supplement (doi:10.1039/c8tc04138e), 2018-01-01
Supplement: c8tc04138e1.pdf [file c8tc04138e1.pdf]

## **Supporting Information**

### **All Solution-Processed Red Organic Light-Emitting Diodes Based on New Thermally Cross-Linked Heteroleptic Ir(III) Complex**

Woosum Cho,<sup>a</sup> Saripally Sudhaker Reddy,<sup>a</sup> Junyoung Kim,<sup>a</sup> Young-Rae Cho,<sup>\*b</sup> Sung-Ho Jin<sup>\*a</sup>

*<sup>a</sup>Department of Chemistry Education, Graduate Department of Chemical Materials and Institute for Plastic Information and Energy Materials, Pusan National University, Busan, 46241, Republic of Korea, E-mail: [shjin@pusan.ac.kr](mailto:shjin@pusan.ac.kr)*

*<sup>b</sup>Division of Materials Science and Engineering, Pusan National University, Busandaehak-ro 63-2, Busan 46241, Republic of Korea, E-mail: [yescho@pusan.ac.kr](mailto:yescho@pusan.ac.kr)*

## Device fabrication

Patterned indium tin oxide (ITO) glass substrate with a sheet resistance of  $10 \Omega$  per square was pre-cleaned with a cleaning detergent (Sigma-Aldrich, Micro-90 concentrated cleaning solution) followed by deionized water, acetone, and isopropyl alcohol in ultrasonic bath at  $50^\circ\text{C}$ . After this cleaning cycle, the ITO glass was treated in UV-ozone chamber for 20 min before device fabrication. Firstly, the HTL was VNPB (Lumtec, 95%+), which is a 0.5 wt% solution in chlorobenzene (CB), was spin-coated onto the PEDOT:PSS (Clevios P VP AI4083). The HTL was then annealed at  $150^\circ\text{C}$  for 30 min in glove box for thermal cross-linking. The EML, which is a mixed solution of VNPB:DV-OXD (weight ratio, 1:1) doped with 10 wt% of the Ir(III) complex, were spin-coated onto the cross-linked HTL (X-HTL) coated substrate. The configuration of ITO/PEDOT:PSS (40 nm)/X-HTL (30 nm)/EML (40 nm)/TmPyPB (50 nm)/LiF (1 nm)/Al (100 nm). The EML was then annealed at  $185^\circ\text{C}$  for 30 min in glove box. ETL and cathode evaporated in vacuum chamber.

Compared the devices of ETL fabrication through vacuum deposition and solution-processing. The HIL, HTL and EML were followed cross-linking red PHOLEDs method. The ETL was TPBi, which was soluble in organic solvents, to compare the different method of ETL fabrication. Firstly, vacuum deposition was evaporated in vacuum at pressure  $5 \times 10^{-6}$  Torr. The deposition rate of ETL was  $1 \text{ \AA/s}$ . Secondly, solution-processing was a 1 wt% in CB. Which was spin-coated onto the cross-linked EML coated substrate. The ETL was then annealed at  $100^\circ\text{C}$  for 30 min in glove box to remove residual solvent. Finally, both devices, LiF and Al were evaporated under  $5 \times 10^{-6}$  Torr in a vacuum chamber at deposition rates of  $0.1 \text{ \AA/s}$  and  $5 \text{ \AA/s}$ , respectively. The emitting area of PHOLED device was  $9 \text{ mm}^2$  for all the samples.

All measurements were carried out under ambient condition at RT. The thickness of each layer was measured by an Alpha-step IQ surface profiler (KLA Tencor, San Jose, CA). The

current density and voltage were controlled with a measurement unit (Keithley, model 236) power source. The luminance, current efficiency, external quantum efficiency, Commission International de L'Eclairage (CIE) coordinates (x,y), current density characteristics, and electroluminescence spectra were measured by a spectra scan CS-2000 photometer (Minolta).

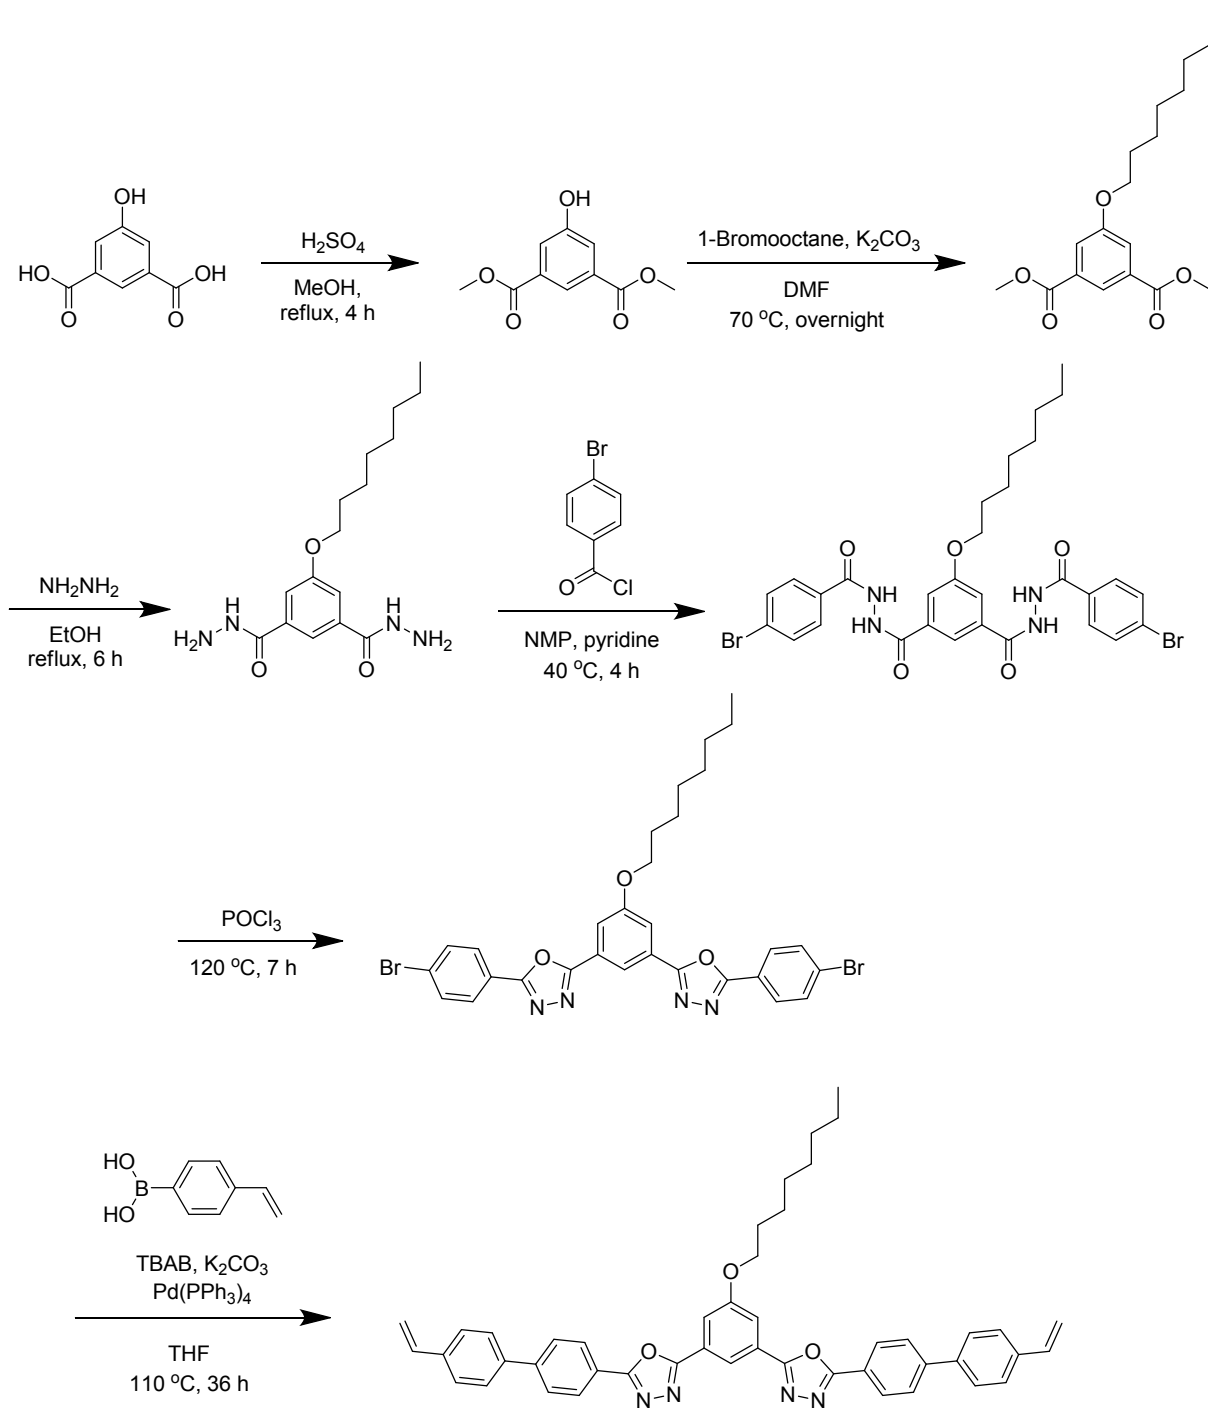

**Scheme S1** Synthetic route of DV-OXD.

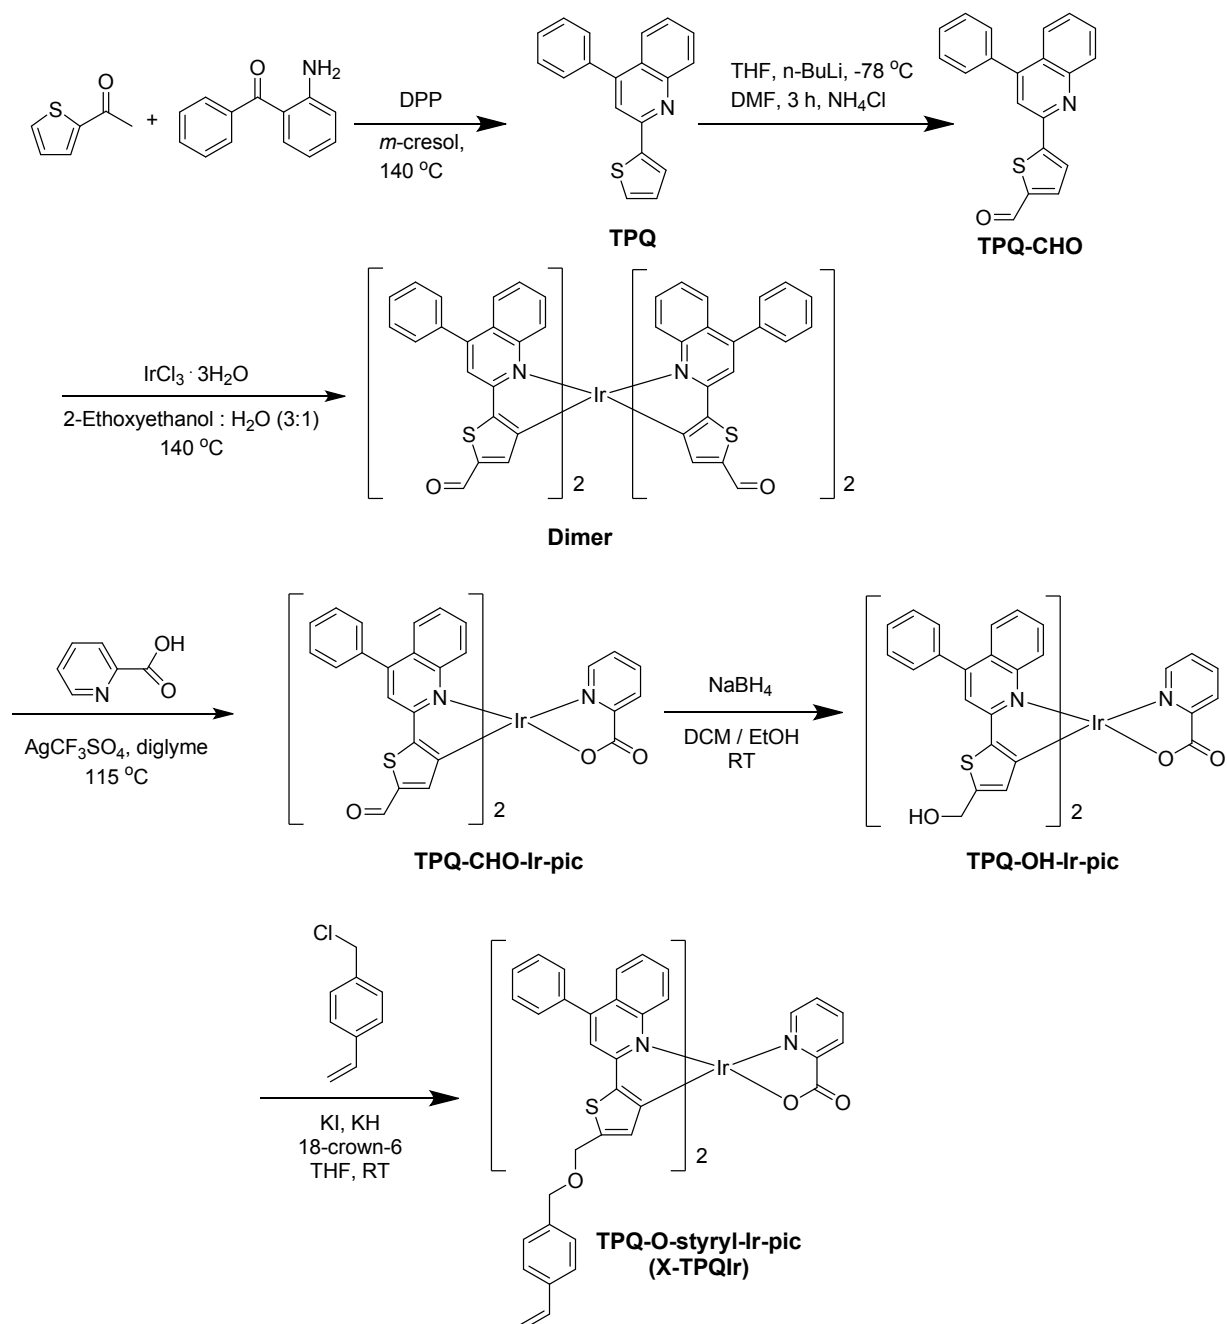

**Scheme S2** Synthetic route of X-TPQIr.

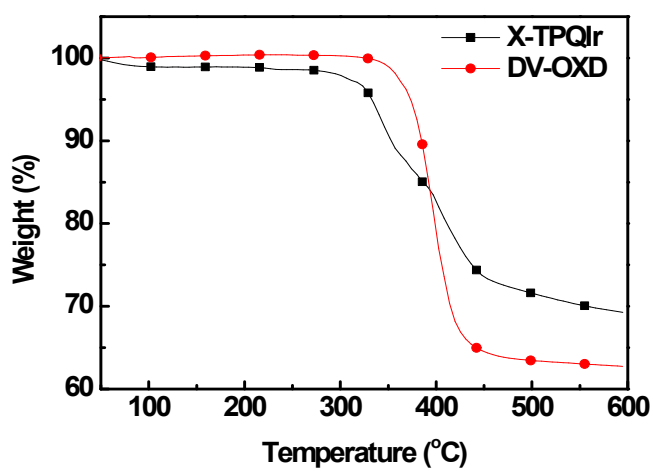

Fig. S1 TGA thermogram of X-TPQIr and DV-OXD.

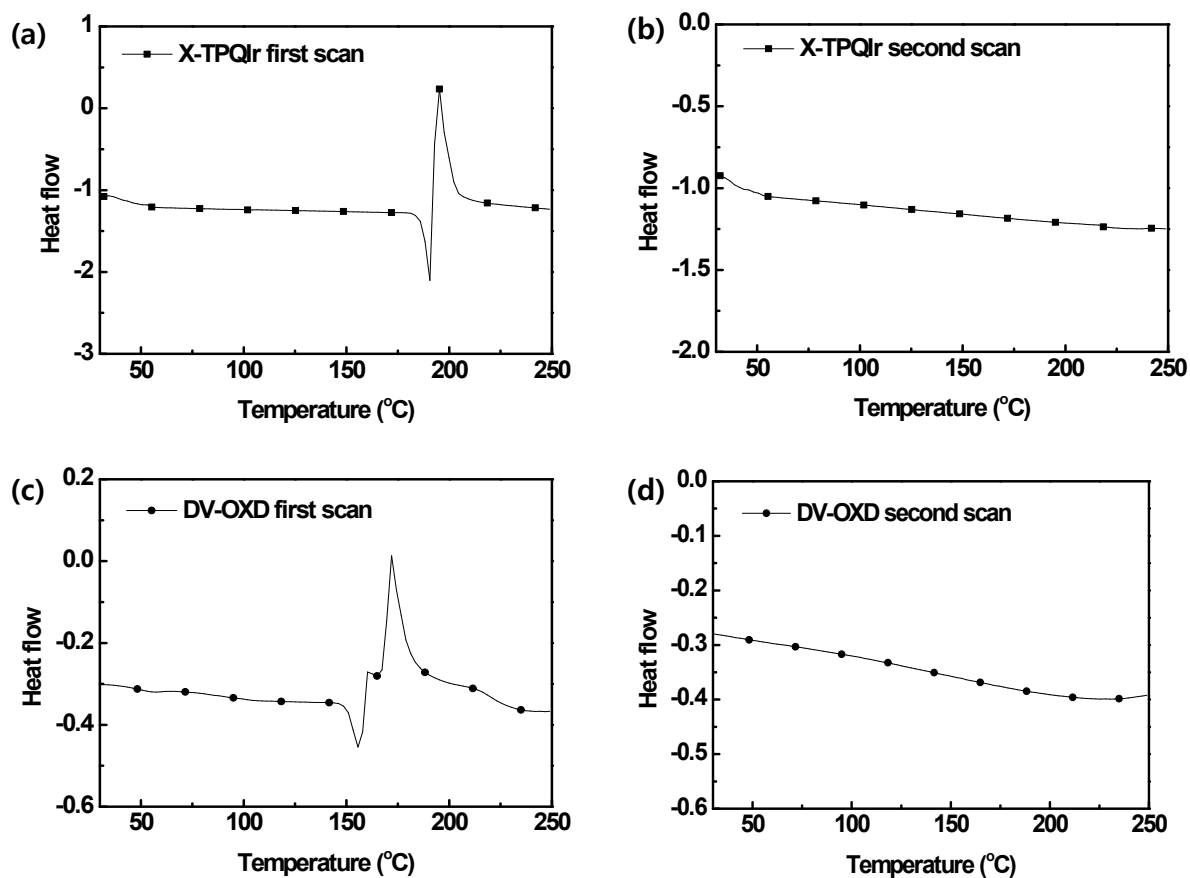

**Fig. S2** DSC curves (first scan and second scan) of (a), (b) X-TPQIr and (c), (d) DV-OXD measured at a scan rate of 10 °C/min under a N<sub>2</sub> atmosphere.

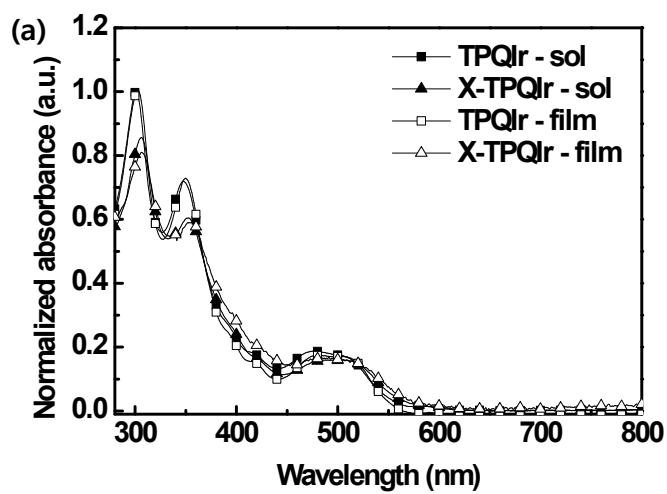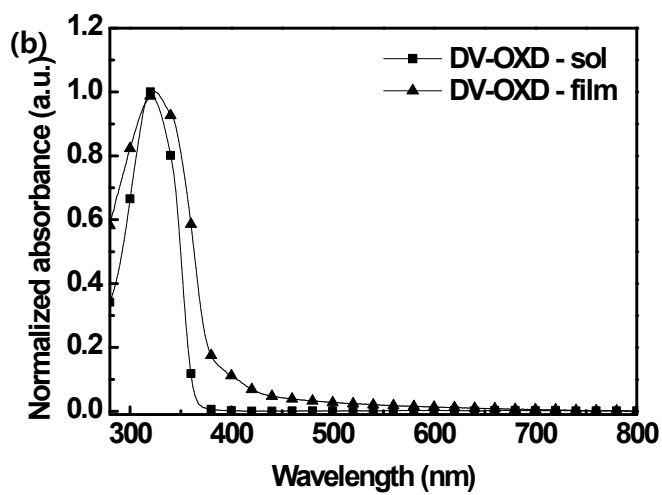

Fig. S3 UV-vis absorption of (a) X-TPQIr and (b) DV-OXD.



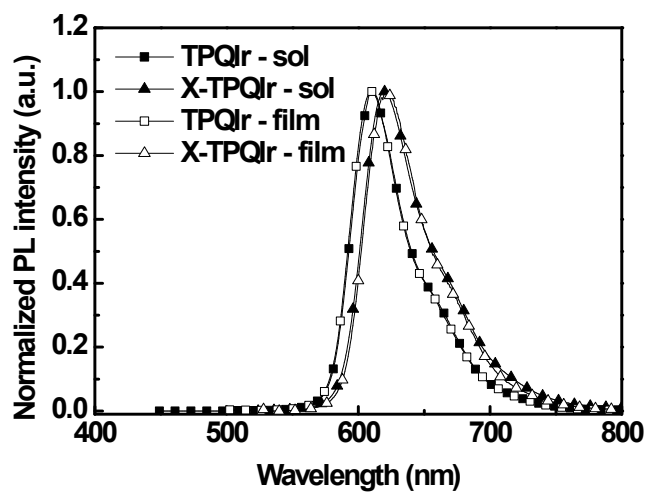

Fig. S4 PL spectra of X-TPQIr.

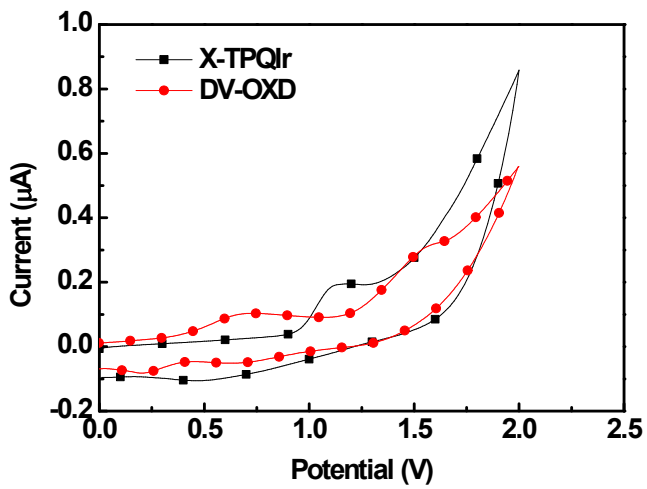

Fig. S5 CV of X-TPQIr and DV-OXD measured in MC at a scan rate of 100 mV/S.

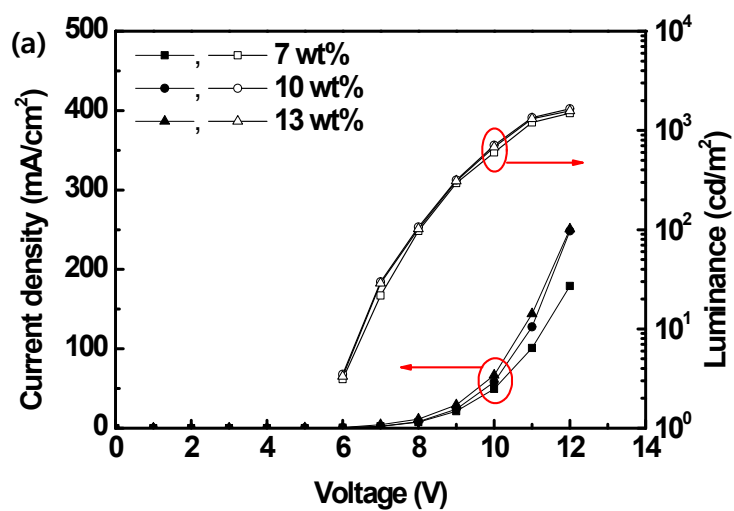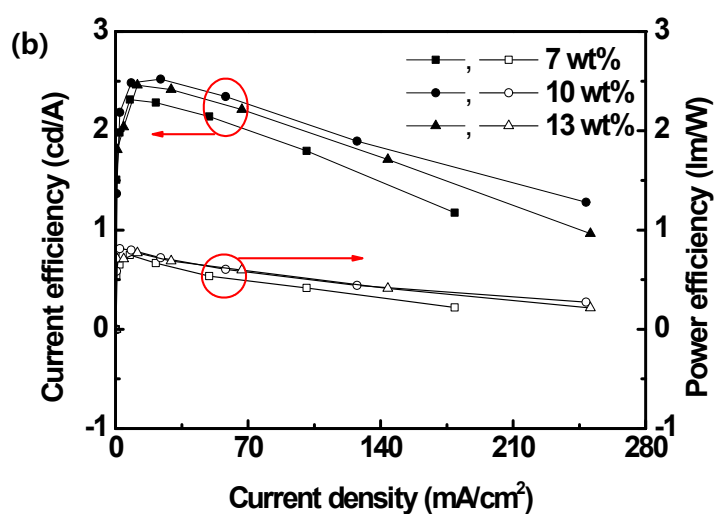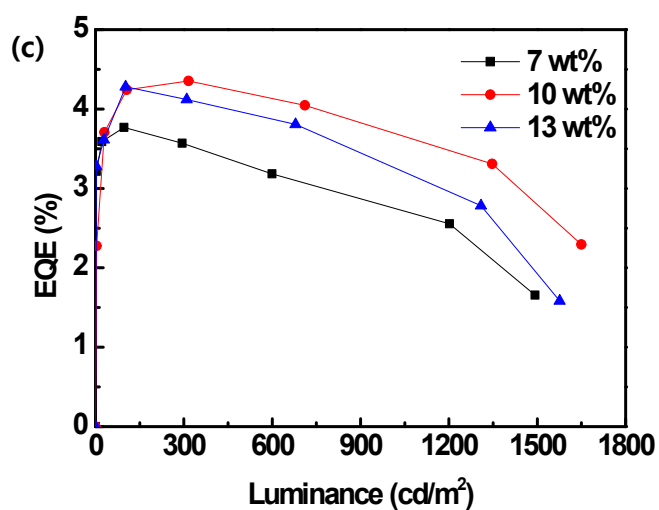

Fig. S6 (a) J-V-L characteristic, (b) CE-J-PE and (c) EQE of deep-red PHOLEDs with different doping ratio of cross-linked EML.

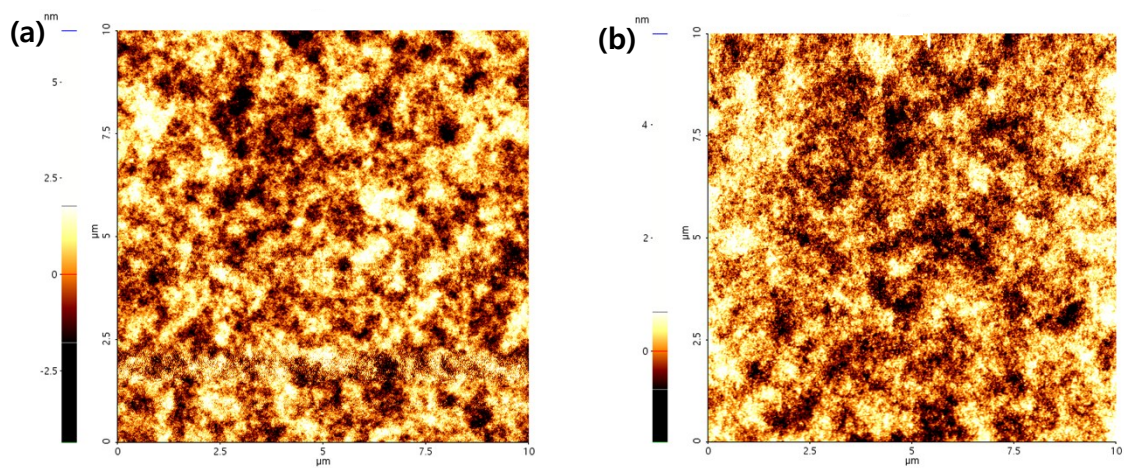

**Fig. S7** AFM topographic image of (a) cross-linking and (b) after rinsing.

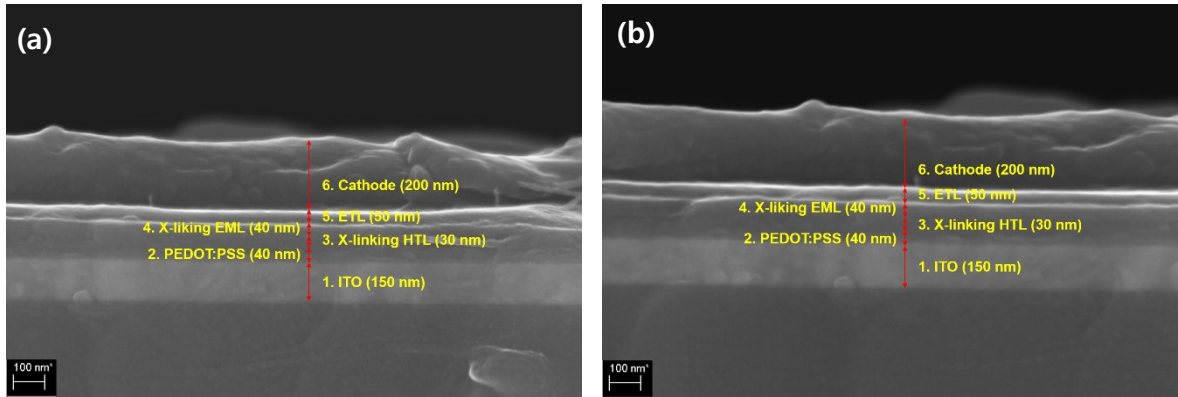

**Fig. S8** SEM image of cross section of (a) cross-linking and (b) after rinsing.

**Table S1** Thermal, photophysical and electrochemical data of new complexes.

|                 | $T_d^a$ | $\lambda_{abs}^b$ | $\lambda_{abs}^c$ | $\lambda_{em}^d$ | $\lambda_{em}^e$ | $\Phi_{PL}^f$ | $\Phi_{PL}^g$ | $E_g^h$ | HOMO/LUMO <sup>i</sup> |
|-----------------|---------|-------------------|-------------------|------------------|------------------|---------------|---------------|---------|------------------------|
|                 | (°C)    | (nm)              | (nm)              | (nm)             | (nm)             |               |               | (eV)    | (eV)                   |
| DV-OXD          | 378     | 320               | 325               | -                | -                | -             | -             | 3.4     | -5.63/-2.22            |
| Ir(III) complex | 330     | 306,352,479       | 306,357,487       | 620              | 621              | 0.20          | 0.26          | 2.1     | -5.29/-3.16            |

<sup>a</sup>Temperature with 5% mass loss measure by TGA with a heating rate of 5 °C/min under N<sub>2</sub>. <sup>b</sup>Measured in CHCl<sub>3</sub> solution at 1x10<sup>-5</sup> M concentration. <sup>c</sup>Measured in a film state. <sup>d</sup>Maximum emission wavelength, measured in CHCl<sub>3</sub> solution at 1x10<sup>-5</sup> M concentration. <sup>e</sup>Maximum emission wavelength measured in a film state. <sup>f</sup>Measured in 1x10<sup>-5</sup> M CHCl<sub>3</sub> solution relative to Ir(piq)<sub>2</sub>(acac) ( $\Phi_{PL}$ = 0.2). <sup>g</sup>Measured in a film state relative to Ir(piq)<sub>2</sub>(acac) ( $\Phi_{PL}$ = 0.2). <sup>h</sup>Estimated from the onset of the absorption in CHCl<sub>3</sub> solution. ( $E_g^{opt} = 1240/\lambda_{onset}$ ). <sup>i</sup>Determined from the onset of CV oxidation and UV-visible absorption edge.

**Table S2** Device performances of cross-linking red PHOLEDs with Ir(III) complex.

| Doping concentration | Annealing temperature | Turn-on <sup>a</sup> | EQE <sup>b</sup> | CE <sup>b</sup> | PE <sup>b</sup> | Luminance <sup>b</sup> | CIE at 30 cd/m <sup>2</sup> |
|----------------------|-----------------------|----------------------|------------------|-----------------|-----------------|------------------------|-----------------------------|
| (%)                  | (°C)                  | (V)                  | (%)              | (cd/A)          | (lm/W)          | (cd/m <sup>2</sup> )   | (x, y)                      |
| 7                    | 180                   | 5.11                 | 3.76             | 2.31            | 0.74            | 1492                   | (0.67, 0.31)                |
| 10                   | 180                   | 5.32                 | 4.35             | 2.52            | 0.81            | 1649                   | (0.68, 0.31)                |
| 13                   | 180                   | 5.23                 | 4.28             | 2.46            | 0.77            | 1575                   | (0.68, 0.31)                |

<sup>a</sup>@ 1 cd/m<sup>2</sup>. <sup>b</sup>Maximum efficiency.

**Table S3** Comparative performance of OLEDs containing a cross-linked EML.

| Year | Previous literature | CIE coordinates (x, y) | CE <sup>a</sup> , Luminance <sup>a</sup> | EQE   |
|------|---------------------|------------------------|------------------------------------------|-------|
| 2007 | Ref. [1]            | (0.67, 0.32)           | 2.1 cd/A, 700 cd/m <sup>2</sup>          | -     |
| 2008 | Ref. [2]            | (0.55, 0.44)           | 18.4 cd/A, 100 cd/m <sup>2</sup>         | -     |
| 2009 | Ref. [3]            | -                      | - , 350 cd/m <sup>2</sup>                | 2.1%  |
| 2010 | Ref. [4]            | -                      | 0.28 cd/A, 40 cd/m <sup>2</sup>          | -     |
| 2013 | Ref. [5]            | (0.38, 0.60)           | 34.4 cd/A, 110 cd/m <sup>2</sup>         | -     |
| 2016 | Ref. [6]            | (0.54, 0.45)           | 0.37 cd/A, 120 cd/m <sup>2</sup>         | 0.3%  |
|      |                     | (0.61, 0.38)           | 0.40 cd/A, 150 cd/m <sup>2</sup>         | 0.37% |
| 2018 | Our work            | (0.68, 0.31)           | 2.52 cd/A, 1499 cd/m <sup>2</sup>        | 4.59% |

<sup>a</sup> Maximum efficiency.



## References

1. M. C. Gather, A. Köhnen, A. Falcou, H. Becker, K. Meerholz, *Adv. Funct. Mater.*, 2007, **17**, 191.
2. N. Rehmman, C. Ulbricht, A. Kohnen, P. Zacharias, M. C. Gather, D. Hertel, E. Holder, K. Meerholz, U. S. Schubert, *Adv. Mater.*, 2008, **20**, 129.
3. B. W. Ma, B. J. Kim, D. A. Poulsen, S. J. Pastin, J. M. J. Frechet, *Adv. Funct. Mater.*, 2009, **19**, 1024.
4. H. Wettach, S. S. Jester, A. Colsmann, U. Lemmer, N. Rehmman, K. Meerholz, S. Hoger, *Synthetic Met.*, 2010, **160**, 691.
5. G. Liaptsis, D. Hertel, K. Meerholz, *Angew. Chem. Int. Ed.*, 2013, **52**, 9563.
6. L. Derue, S. Olivier, D. Tondelier, T. Maindron, B. Geffroy, E. Ishow, *ACS Appl. Mater. Interfaces*, 2016, **8**, 16207.
